# Supplementary material for: A low-cost, label-free DNA detection method in lab-on-chip format based on electrohydrodynamic instabilities, with application to long-range PCR
Source: Royal Society of Chemistry journal article supplement (doi:10.1039/c2lc40372b), 2012-01-01
Supplement: c2lc40372b.pdf [file c2lc40372b.pdf]

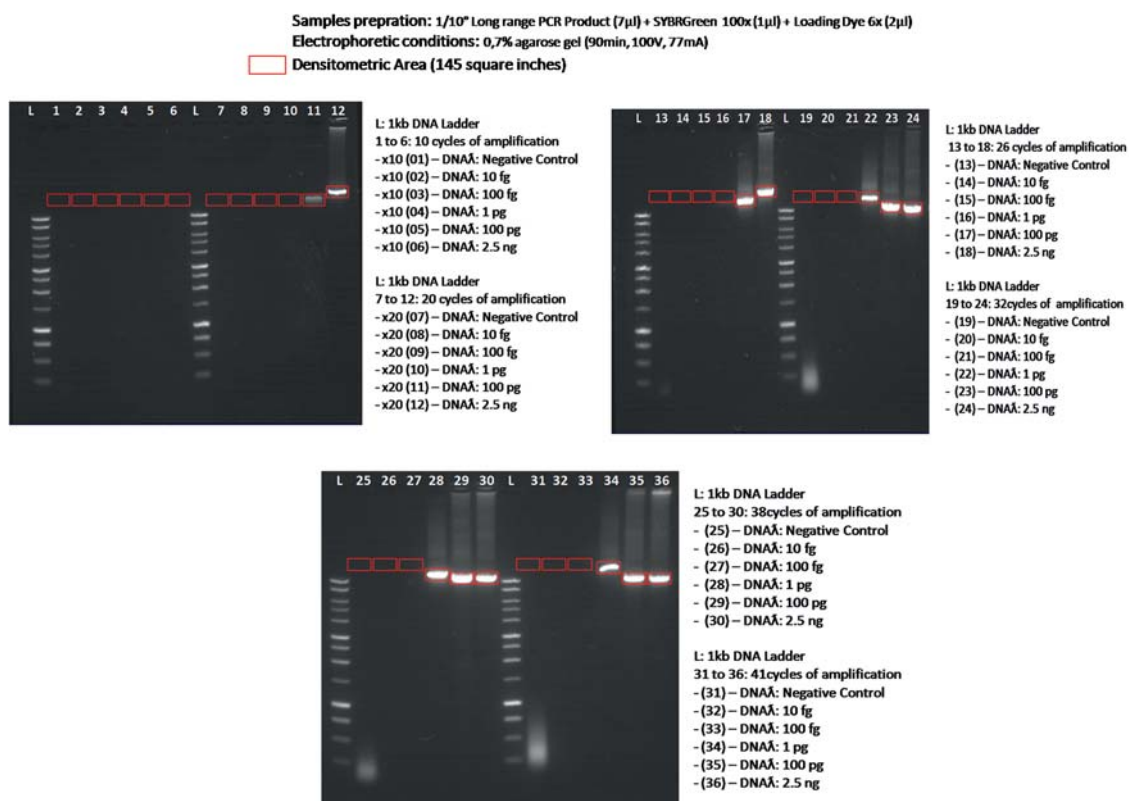

Supplementary Figure S1

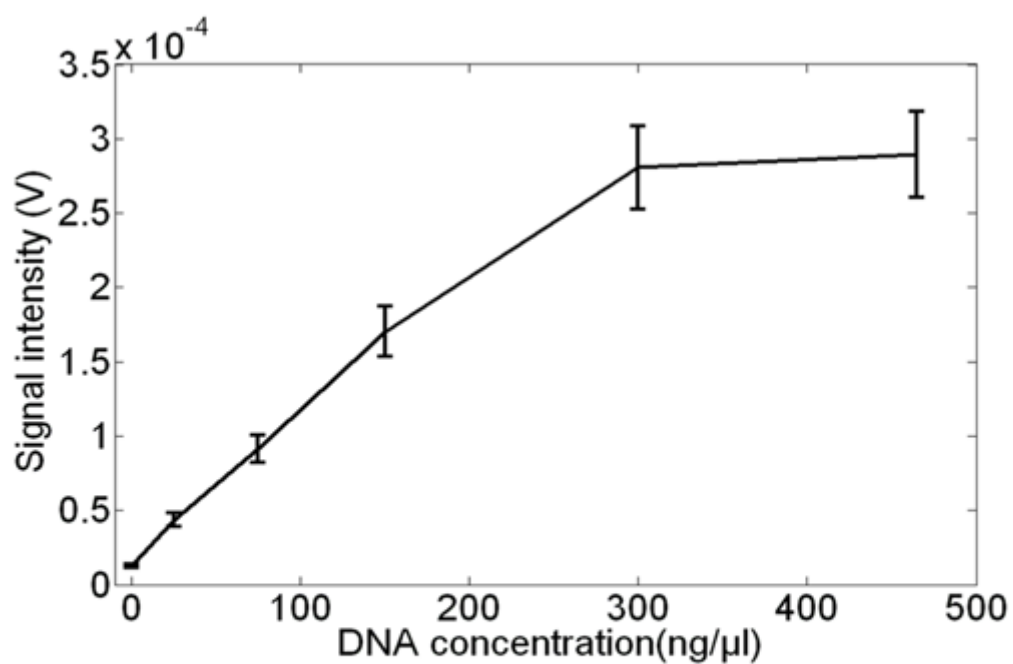

Supplementary Figure S2: Signal intensity versus concentration for direct detection (without amplification) of lambda-phage DNA in TE 1X. The error bars (10%) represent an estimate integrating experiments performed on different samples at different times
